# Supplementary material
Source: PubMed Central journal article supplement (PMC5332582)

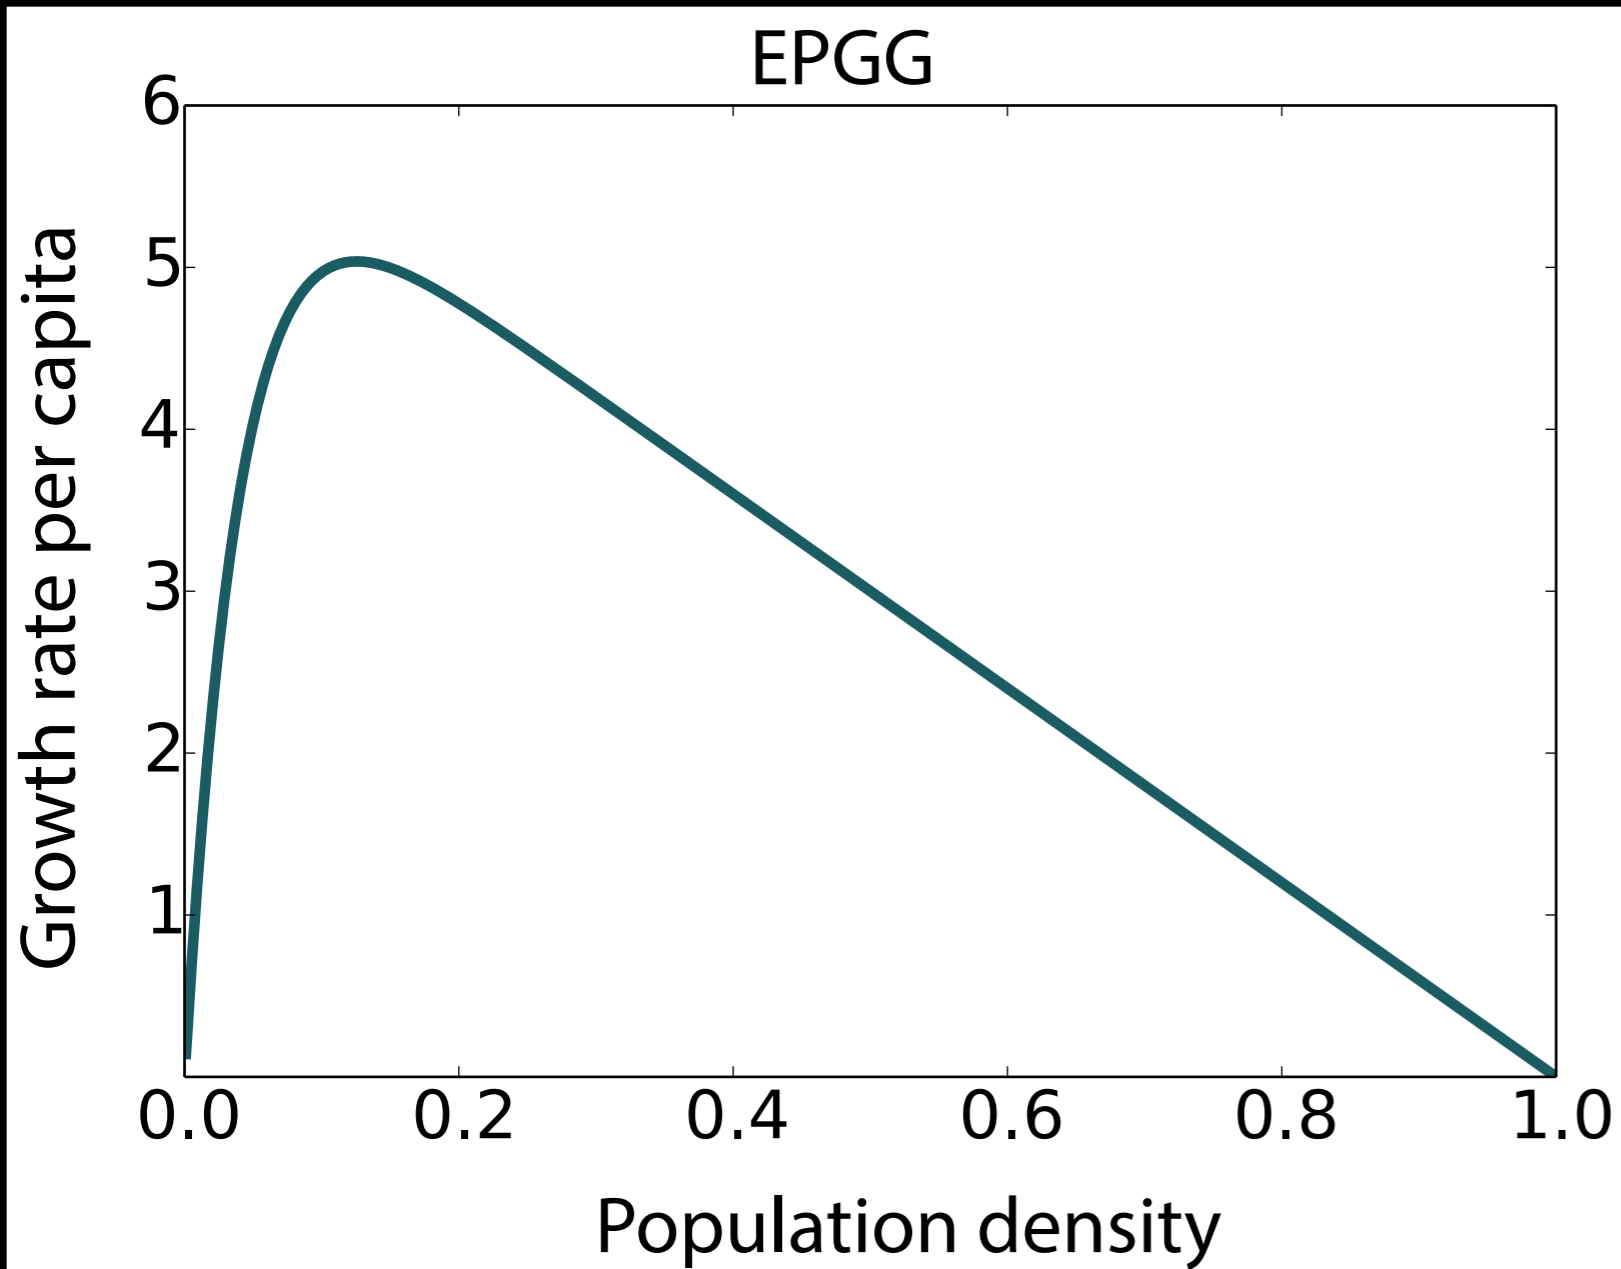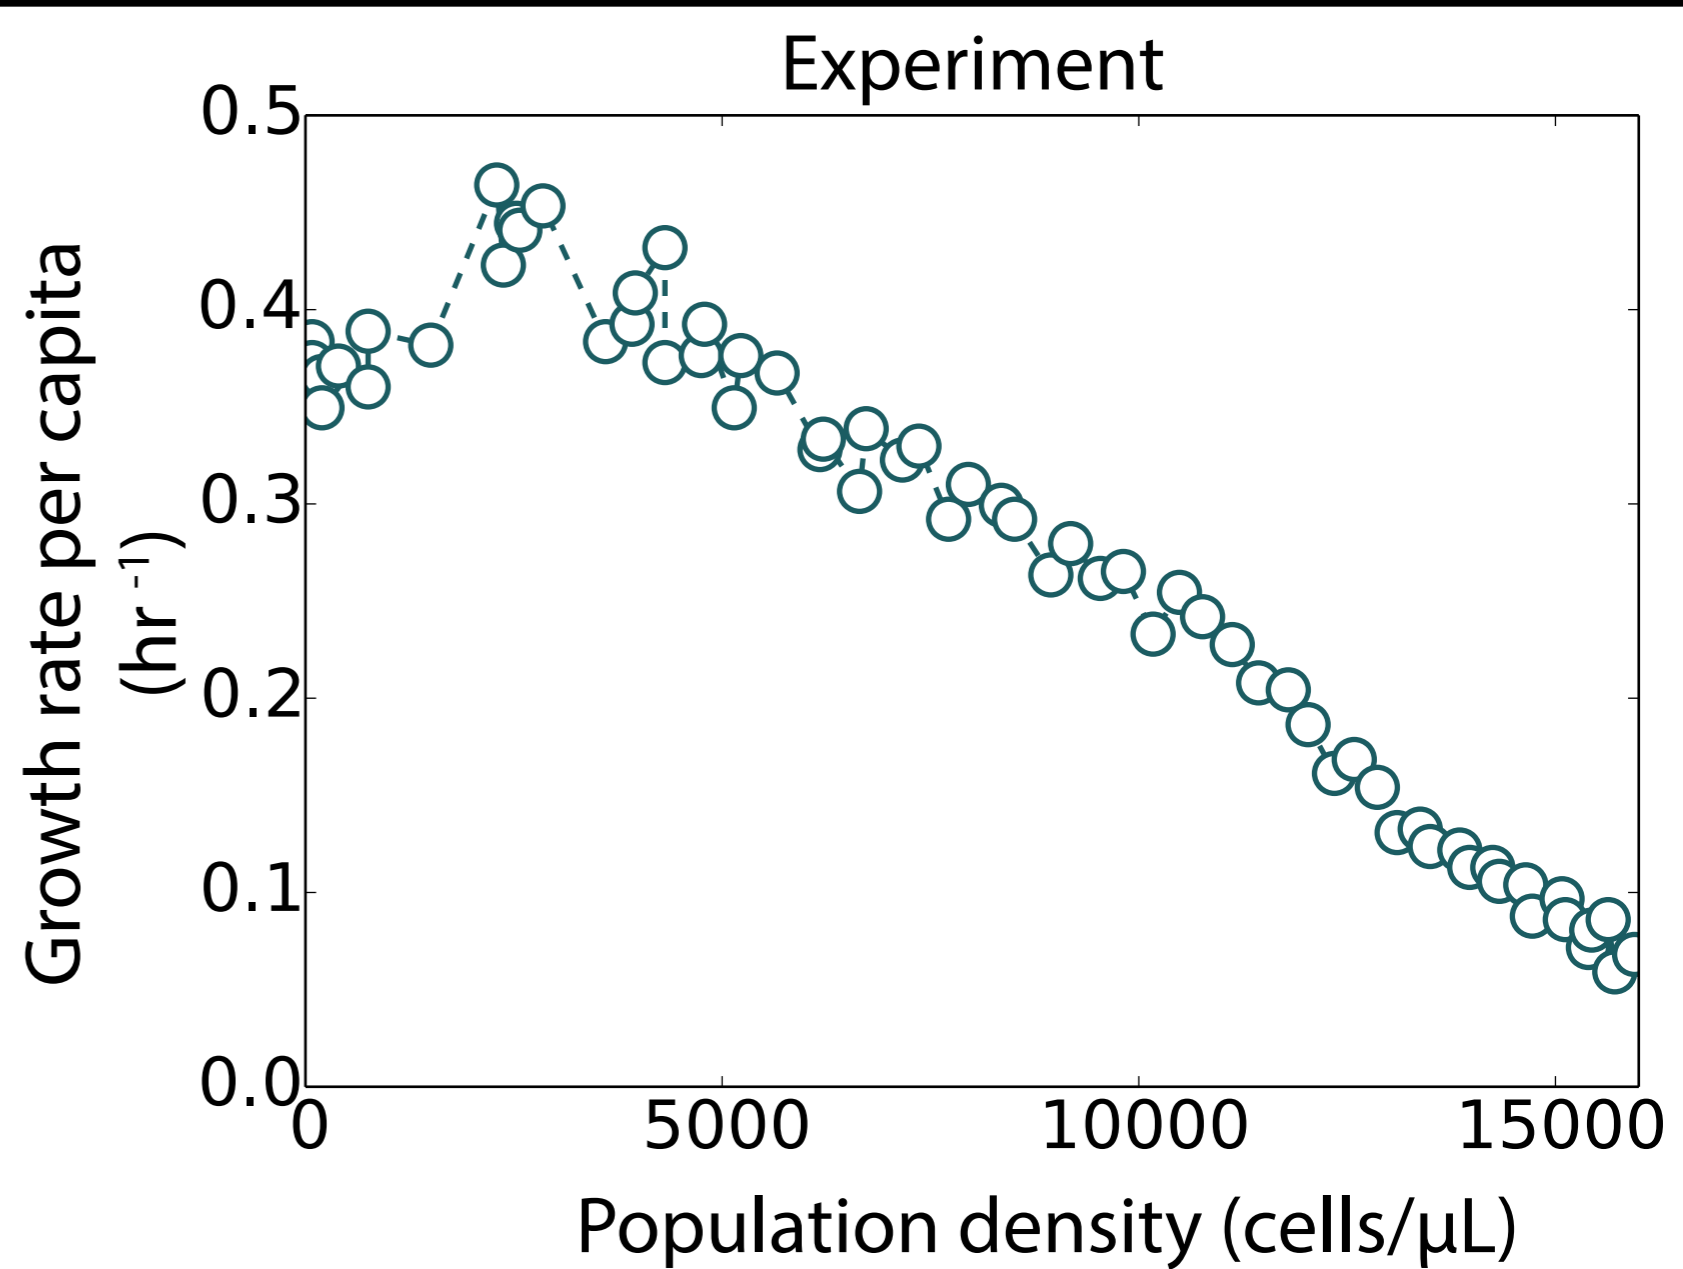

Supplement: rsif20160967supp2.pdf [file rsif20160967supp2.pdf]

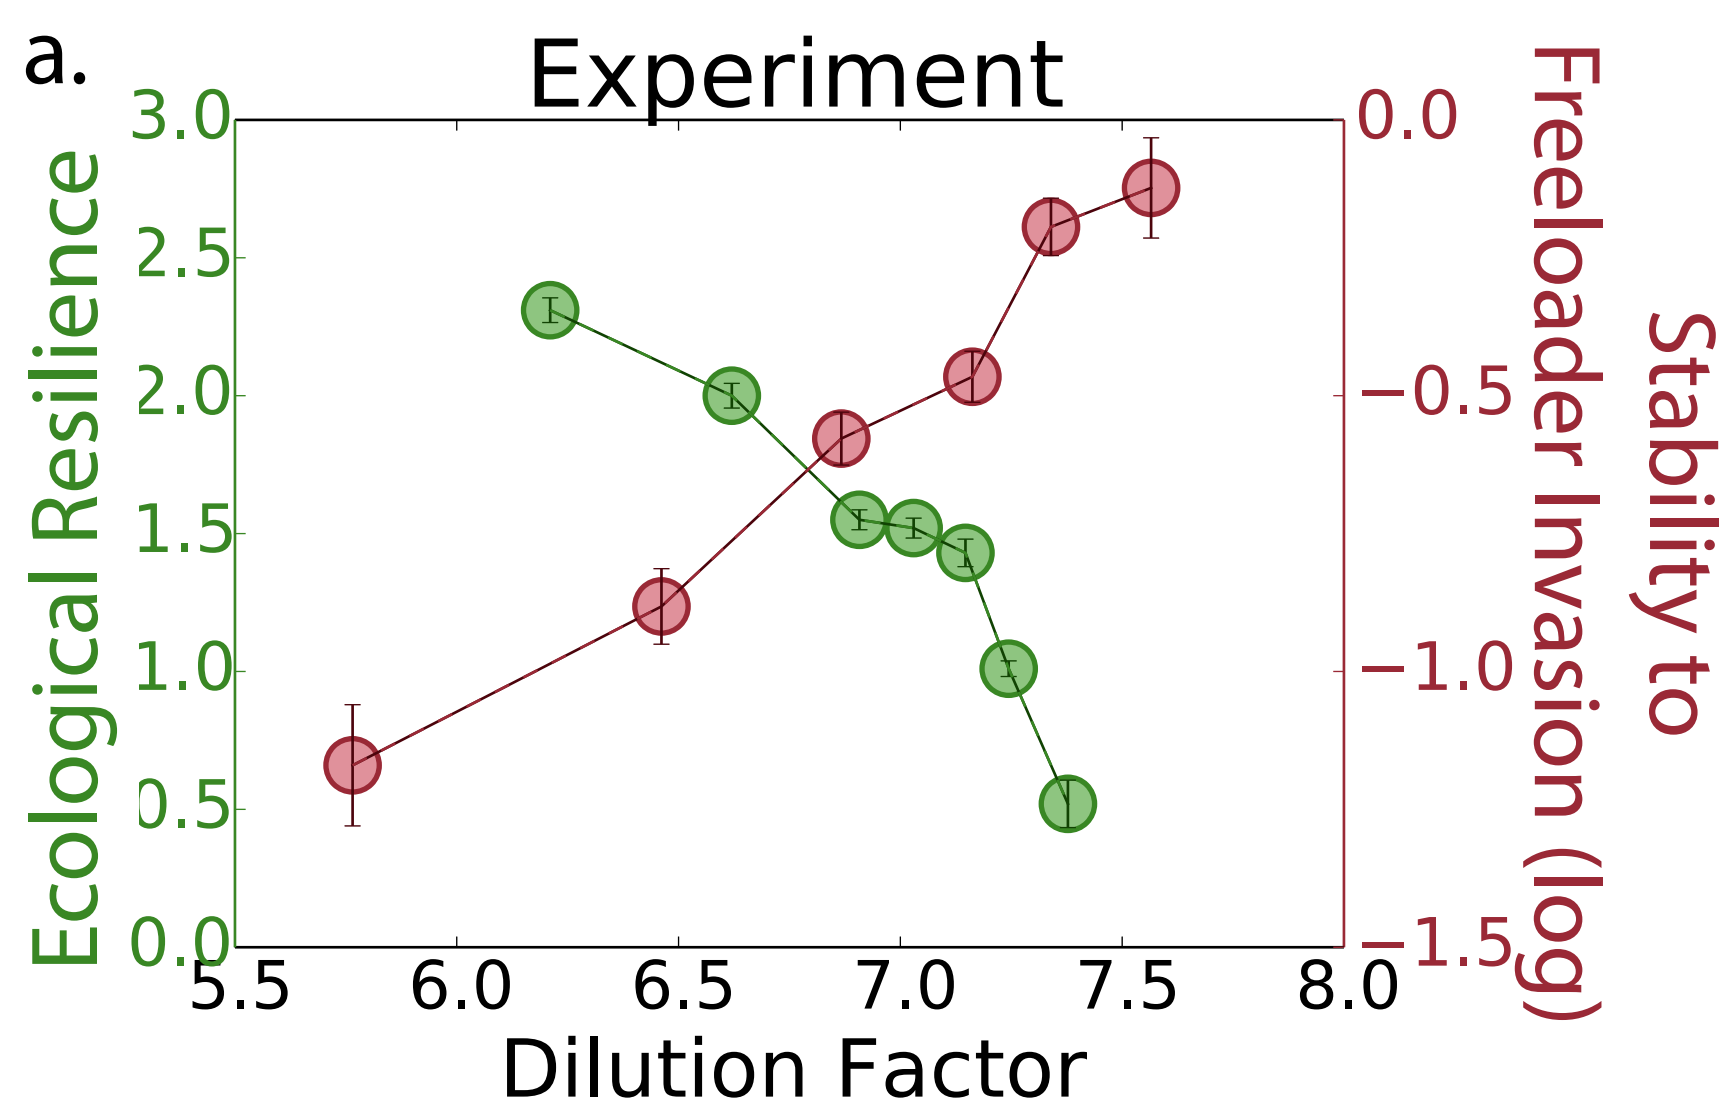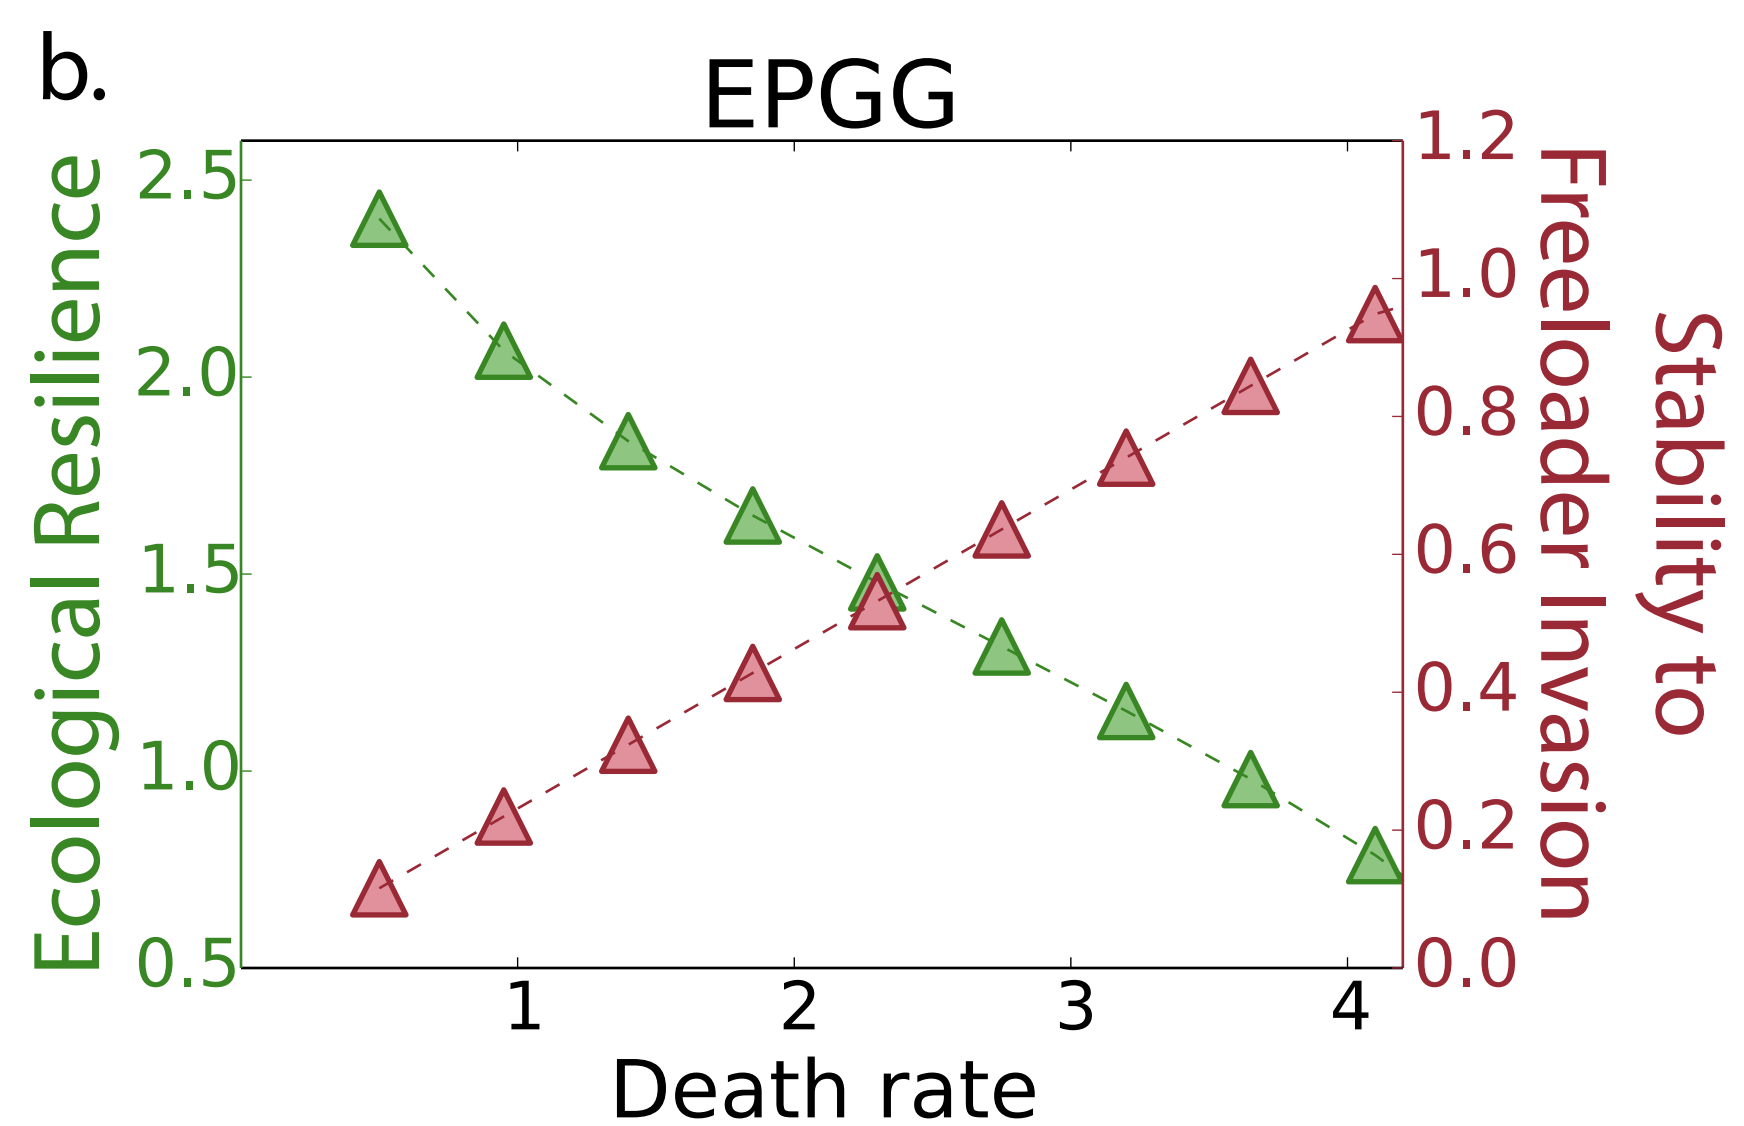

Supplement: rsif20160967supp3.pdf [file rsif20160967supp3.pdf]
